# Supplementary material
Source: Springer Nature journal article supplement (https://www.springermedizin.de/resource/supplementary/13019_2010_275_MOESM4_ESM.pdf/9638282)

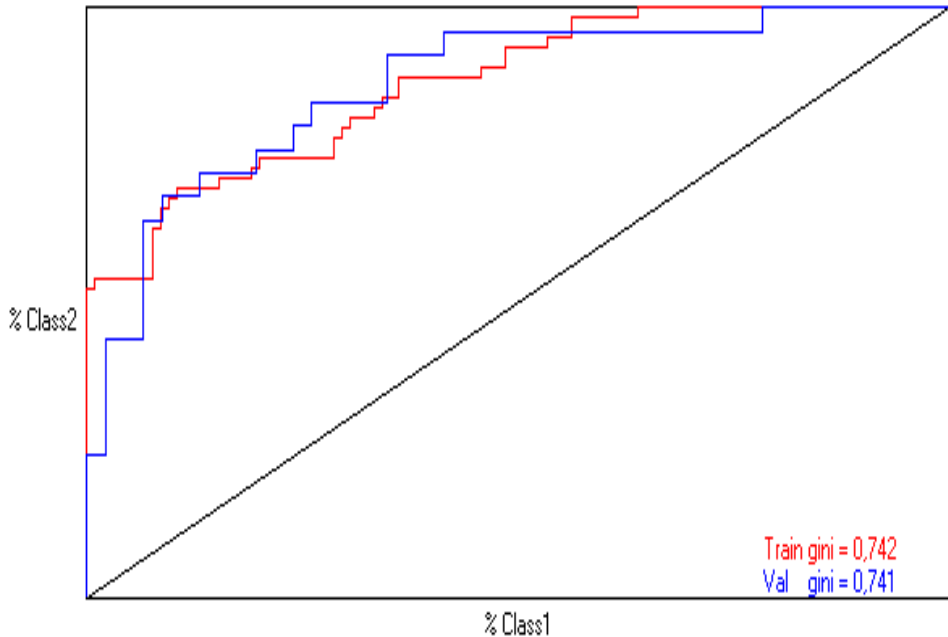

**Variable**

**Training data**

**Validation data**

**Keep**

IRC

|||||

|||||

1

Arrc

|||||

|||||

1

dInt2

|||||

|||||

1

TCEC

|||||

|||||

1

PoMD

|||||

|||||

1

Supplement: MOESM4 [file 9638282]
